# Supplementary material for: Computing disease-linked SOD1 mutations: deciphering protein stability and patient-phenotype relations
Source: PubMed Central journal article supplement (PMC5498623; doi:10.1038/s41598-017-04950-9), 2017-07-05
Supplement: 41598_2017_4950_MOESM1_ESM.pdf [file 41598_2017_4950_MOESM1_ESM.pdf]

## *Supplementary Materials*

*Running Title: Stability prediction of SOD1 patient-phenotype pathogenesis*

### **Computing disease-linked SOD1 mutations: deciphering protein stability and patient-phenotype relations**

Vijay Kumar<sup>1</sup>, Safikur Rahman<sup>2</sup>, Hani Choudhry<sup>3</sup>, Mazin A. Zamzami<sup>4</sup>, Mohammad Sarwar Jamal<sup>5</sup>, Asimul Islam<sup>1</sup>, Faizan Ahmad<sup>1</sup> and Md. Imtaiyaz Hassan<sup>1,\*</sup>

<sup>1</sup>*Centre for Interdisciplinary Research in Basic Sciences, Jamia Millia Islamia, New Delhi – 110025, India*

<sup>2</sup>*Department of Medical Biotechnology, Yeungnam University, Gyeongsan, 712-749, South Korea*

<sup>3</sup>*Department of Biochemistry, Cancer Metabolism and Epigenetic Unit, Faculty of Science, Center of Innovation in Personalized Medicine, Cancer and Mutagenesis Unit, King Fahd Center for Medical Research, King Abdulaziz University, Jeddah, Saudi Arabia*

<sup>4</sup>*Department of Biochemistry, Cancer Metabolism and Epigenetic Unit, Faculty of Science, Cancer and Mutagenesis Unit, King Fahd Center for Medical Research, King Abdulaziz University, Jeddah, Saudi Arabia.*

<sup>5</sup>*King Fahd Medical Research Center, King Abdulaziz University, P.O. Box 80216 Jeddah, 21589, Kingdom of Saudi Arabia.*

*\*To whom correspondence should be addressed:*

**Md. Imtaiyaz Hassan, Ph.D.**

Centre for Interdisciplinary Research in Basic Sciences,  
Jamia Millia Islamia, New Delhi-110025, India  
E-mail: mihassan@jmi.ac.in

**Table S1.** Effects of missense mutations on the stability of human SOD1

| <b>Mutation</b> | <b><math>\Delta\Delta G(m)</math></b> | <b><math>\Delta\Delta G(d)</math></b> | <b>Class</b> | <b>Reference</b> |
|-----------------|---------------------------------------|---------------------------------------|--------------|------------------|
| A4V             | 1.62                                  | 4.31                                  | B            | 1                |
| I18V            | 0.37                                  |                                       | B            | 2                |
| V29A            | 2.81                                  |                                       | B            | 2                |
| V31A            | 1.39                                  |                                       | B            | 2                |
| I35V            | 0.66                                  |                                       | B            | 2                |
| L38A            | 2.95                                  |                                       | B            | 2                |
| L38V            | 2.25                                  | 3.24                                  | B            | 3                |
| G41D            | 2.91                                  | 3.47                                  | B            | 1                |
| G41S            | 2.93                                  | 4.47                                  | B            | 1                |
| H43R            | 2.68                                  | 4.05                                  | B            | 1                |
| F45A            | 2.07                                  |                                       | B            | 2                |
| H46R            | -0.81                                 | -0.48                                 | M            | 1                |
| V47A            | 1.45                                  |                                       | B            | 2                |
| F64A            | -0.2                                  |                                       | B            | 2                |
| D76V            | 0.2                                   | 0.06                                  | M            | 3                |
| D76Y            | 0.21                                  | 0.09                                  | M            | 3                |
| V81A            | 0.01                                  |                                       | B            | 2                |
| L84A            | 1.85                                  |                                       | M            | 2                |
| L84V            | 1.87                                  | 2.65                                  | M            | 1                |
| G85R            | 1.93                                  | 0.9                                   | M            | 1                |
| N86D            | -0.05                                 | 0.94                                  | B            | 3                |
| N86K            | 0.66                                  | 1.41                                  | B            | 3                |
| N86S            | -0.07                                 | 0.45                                  | B            | 3                |
| V87A            | 1.61                                  |                                       | B            | 2                |
| D90A            | 0.66                                  | 0.65                                  | B            | 1                |
| D90V            | 1.41                                  | 1.85                                  | B            | 3                |
| G93A            | 2.43                                  | 2.98                                  | B            | 1                |
| G93S            | 3.7                                   | 3.1                                   | B            | 4                |
| G93R            | 4.4                                   | 3                                     | B            | 4                |
| G93D            | 5.7                                   | 4.5                                   | B            | 4                |
| G93V            | 7                                     | 5.4                                   | B            | 4                |
| V97A            | 2.9                                   |                                       | B            | 2                |
| E100G           | 0.91                                  | 2.22                                  | B            | 1                |
| D101G           | 0.72                                  | 1.39                                  | B            | 3                |
| D101N           | -0.8                                  | -0.75                                 | B            | 3                |
| I104A           | 1.53                                  |                                       | B            | 2                |
| I104F           | 0.72                                  | 1.24                                  | B            | 1                |
| S105L           | 1.81                                  | 2.6                                   | B            | 3                |
| L106V           | 1.78                                  | 3.62                                  | B            | 1                |
| L106A           | 3.71                                  |                                       | B            | 2                |
| C111A           | -0.42                                 |                                       | B            | 2                |
| I112A           | 1.25                                  |                                       | B            | 2                |
| I113T           | 1.25                                  | 2.48                                  | B            | 1                |
| G114A           | 2.33                                  | 3.27                                  | B            | 3                |
| L117A           | 1.78                                  |                                       | B            | 2                |

|       |       |       |   |   |
|-------|-------|-------|---|---|
| V119A | 2.55  |       | B | 2 |
| N139D | 0.01  | -0.36 | B | 3 |
| N139K | 0.06  | 0.24  | B | 3 |
| L144A | -0.13 |       | B | 2 |
| L144S | 0.2   | 1.07  | B | 3 |
| L144F | 0.23  | 1.89  | B | 1 |
| V148G | 2.53  | 4.56  | B | 1 |
| I149A | 4.05  |       | B | 2 |
| I149V | 0.27  |       | B | 2 |

*Data in columns are from left: wild-type, position and mutant residue, free energy change for apo-monomer and holodimer in kcal/mol,  $\Delta\Delta G(m)$  and  $\Delta\Delta G(d)$ , mutations class ( $\beta$ -sheet, B; metal-region, M; disulfide/cystine region, D)*

**Table S2.** Experimental monomer and dimer stability changes and computed stability changes (kcal/mol) for 2C9V.

| Mutations | $\Delta\Delta G(\text{exp})$<br>(monomer) | $\Delta\Delta G(\text{exp})$<br>(dimer) | CUPSAT | IMUTANT<br>2.0 | IMUTANT<br>3.0 | POPMUSIC<br>3.1 | ENCoM | FoldX | BEATM<br>USIC | mCSM  |
|-----------|-------------------------------------------|-----------------------------------------|--------|----------------|----------------|-----------------|-------|-------|---------------|-------|
| A4V       | 1.62                                      | 4.31                                    | 1.01   | 1.08           | 0.8            | -0.52           | -0.82 | 0.53  | -1.33         | -0.09 |
| I18V      | 0.37                                      |                                         | 2.25   | 0.79           | 1.09           | 1.53            | 0.21  | 0.28  | 0.28          | -1.57 |
| V29A      | 2.81                                      |                                         | 4.96   | 1.37           | 1.88           | 2.56            | 0.56  | 1.22  | 0.92          | -2.53 |
| V31A      | 1.39                                      |                                         | 4.37   | 2.05           | 2.08           | 3.52            | 0.43  | 1.45  | 1.65          | -2.48 |
| I35V      | 0.66                                      |                                         | 2.7    | 0.45           | 0.88           | 1.47            | 0.19  | 0.48  | 0.1           | -1.8  |
| L38A      | 2.95                                      |                                         | 2.91   | 2.34           | 2.29           | 2.92            | 0.65  | 1.74  | 1.24          | -2.62 |
| L38V      | 2.25                                      | 3.24                                    | 2.24   | 0.67           | 1.07           | 1.35            | 0.02  | 1.78  | 0.06          | -1.75 |
| G41S      | 2.93                                      | 4.47                                    | 1.71   | 2.18           | 1.14           | 2.47            | -0.14 | 1.3   | 1.28          | -1.17 |
| G41D      | 2.91                                      | 3.47                                    | 2.74   | 1.65           | 1.09           | 2.49            | -0.1  | 0.94  | 1.3           | -1.7  |
| H43R      | 2.68                                      | 4.05                                    | -2.84  | 1.33           | 0.61           | 1.36            | 0.17  | 1.15  | 0.07          | -2.04 |
| F45A      | 2.07                                      |                                         | 7.04   | 1.28           | 1.11           | 3.94            | 1.1   | 2.64  | 1.96          | -2.87 |
| H46R      | -0.81                                     | -0.48                                   | -3.89  | 0.74           | 0.66           | 1.04            | -0.55 | 2.9   | -0.23         | -1.91 |
| V47A      | 1.45                                      |                                         | 5.52   | 1.19           | 1.3            | 2.91            | 0.57  | 1.2   | 1.2           | -2.98 |
| F64A      | -0.2                                      |                                         | 2.76   | 2.57           | 2.14           | 2.75            | 1.22  | 1.27  | 1.07          | -3.29 |
| D76Y      | 0.21                                      | 0.09                                    | -1.08  | 0.31           | 0.23           | 0.65            | -0.2  | -0.17 | 0.09          | -0.22 |
| D76V      | 0.2                                       | 0.06                                    | -0.59  | -0.29          | 0.31           | 0.31            | 0.29  | 0.18  | -0.05         | 0.11  |
| V81A      | 0.01                                      |                                         | 7.08   | 1.64           | 1.59           | 2.12            | 0.93  | 0.87  | 0.61          | -2.49 |
| L84A      | 1.85                                      |                                         | 4.48   | 1.85           | 1.79           | 2.9             | 1.02  | 1.22  | 1.19          | -2.74 |
| L84V      | 1.87                                      | 2.65                                    | 2.38   | 0.75           | 1.04           | 1.5             | 0.26  | 1.05  | 0.13          | -1.68 |
| G85R      | 1.93                                      | 0.9                                     | 4.03   | 0.7            | 0.63           | 2.25            | -0.9  | 2.07  | 0.72          | -1.27 |
| N86S      | -0.07                                     | 0.45                                    | 0.55   | 1.7            | 0.55           | 0.81            | 0.19  | 0.66  | -0.04         | -1.03 |
| N86D      | -0.05                                     | 0.94                                    | -1.49  | 0.87           | 0.29           | 1.19            | 0.11  | 0.88  | 0.25          | -0.91 |
| N86K      | 0.66                                      | 1.41                                    | 1.62   | 0.38           | 0.11           | 0.88            | -0.16 | 0.17  | 0.02          | -0.29 |
| V87A      | 1.61                                      |                                         | 2.33   | 1.82           | 1.62           | 2.38            | 0.58  | 0.9   | 0.83          | -2.13 |
| D90V      | 1.41                                      | 1.85                                    | 0.71   | 0.58           | -0.04          | 0.68            | 0.08  | 0.58  | 0.42          | 0.03  |
| D90A      | 0.66                                      | 0.65                                    | 1.12   | 0.47           | -0.43          | 0.81            | 0.19  | 0.46  | 0.52          | -0.3  |
| G93V      | 7                                         | 5.4                                     | 2.29   | 0.48           | 1.05           | 2.76            | -0.45 | 2.74  | 1.14          | -0.63 |
| G93A      | 2.43                                      | 2.98                                    | 3.93   | 1.62           | 1.44           | 2.78            | 0.09  | 1.46  | 1.16          | -0.79 |
| G93R      | 4.4                                       | 3                                       | 3      | 1.27           | 0.84           | 1.92            | -0.29 | 1.98  | 0.51          | -0.78 |
| G93D      | 5.7                                       | 4.5                                     | 3.43   | 1.92           | 1.32           | 2.25            | -0.29 | 2.44  | 0.76          | -1.82 |
| G93S      | 3.7                                       | 3.1                                     | 3.33   | 0.93           | 0.55           | 2.2             | -0.36 | 1.88  | 0.71          | -1.24 |
| V97A      | 2.9                                       |                                         | 2.85   | 1.59           | 1.64           | 2.6             | 0.34  | 1.08  | 0.99          | -1.7  |
| E100G     | 0.91                                      | 2.22                                    | 1.94   | 1.26           | 1.09           | 0.74            | 0.27  | 0.21  | 0.63          | -1.95 |
| D101G     | 0.72                                      | 1.39                                    | -2.34  | 2.79           | 1.87           | 1.5             | 0.21  | 1.68  | 0.22          | -1.15 |
| D101N     | -0.8                                      | -0.75                                   | -2.08  | 1.86           | 1.67           | 0.61            | -0.03 | 1     | -0.45         | -1.26 |
| I104A     | 1.53                                      |                                         | 0.42   | 2.25           | 2.4            | 2.91            | 0.73  | 1.09  | 1.24          | -2.91 |
| I104F     | 0.72                                      | 1.24                                    | 4.92   | 1.01           | 1.46           | 0.75            | -0.45 | 3.84  | -0.41         | -1.69 |
| S105L     | 1.81                                      | 2.6                                     | 0.38   | 0.98           | 0.75           | 1.78            | -0.14 | 0.12  | -0.15         | 0.46  |
| L106V     | 1.78                                      | 3.62                                    | 2      | 1.19           | 1.28           | 1               | 0.84  | 1.35  | -0.12         | -1.37 |
| L106A     | 3.71                                      |                                         | 1.12   | 2.47           | 2.25           | 2.17            | 1.56  | 1.63  | 0.8           | -2.32 |
| C111A     | -0.42                                     |                                         | -3.29  | 0.48           | 1.18           | 1.48            | 0.07  | 0.02  | 0.15          | -1.78 |
| I112A     | 1.25                                      |                                         | 3.86   | 2.5            | 1.98           | 2.27            | 0.9   | 1.35  | 0.72          | -3.21 |
| I113T     | 1.25                                      | 2.48                                    | -0.22  | 2.23           | 1.21           | 1.51            | 0.63  | 0.58  | 1.07          | -3.1  |
| G114A     | 2.33                                      | 3.27                                    | 4.56   | 0.34           | 0.75           | 2.2             | 0.01  | 1.24  | 1.97          | -1.58 |
| L117A     | 1.78                                      |                                         | 4.24   | 1.84           | 1.38           | 3.41            | 0.67  | 1.56  | 1.56          | -3.07 |
| V119A     | 2.55                                      |                                         | 2.56   | 0.78           | 0.93           | 3.58            | 0.5   | 1.32  | 1.68          | -2.61 |
| N139K     | 0.06                                      | 0.24                                    | 0.28   | 0.75           | 0.24           | 1.4             | 0.05  | 0.4   | 0.6           | 1.02  |

|              |       |       |       |      |       |      |       |      |       |       |
|--------------|-------|-------|-------|------|-------|------|-------|------|-------|-------|
| <b>N139D</b> | 0.01  | -0.36 | 2.28  | 0.26 | -0.05 | 1    | 0.02  | 0.86 | 0.29  | -1.92 |
| <b>L144F</b> | 0.23  | 1.89  | -1.06 | 1.3  | 1.41  | 0.51 | -0.31 | 0.25 | -0.21 | -1.47 |
| <b>L144S</b> | 0.2   | 1.07  | -0.15 | 1.15 | 0.99  | 1.2  | 0.55  | 0.82 | 0.28  | -2.15 |
| <b>L144A</b> | -0.13 |       | -0.65 | 0.75 | 0.61  | 1.43 | 0.8   | 0.73 | 0.44  | -2.16 |
| <b>V148G</b> | 2.53  | 4.56  | -0.09 | 3.15 | 2.12  | 2.11 | 0.68  | 0.12 | 2.51  | -0.61 |
| <b>I149A</b> | 4.05  |       | 3.55  | 2.66 | 1.92  | 2.87 | 1.02  | 1.47 | 1.5   | -2.9  |
| <b>I149V</b> | 0.27  |       | 2.5   | 0.62 | 0.64  | 1.06 | 0.34  | 0.36 | -0.38 | -1.68 |

**Table S3.** Experimental monomer and dimer stability changes and computed stability changes (kcal/mol) for 1HL4.

| Mutations | $\Delta\Delta G(\text{exp})$<br>(monomer) | $\Delta\Delta G(\text{exp})$<br>(dimer) | CUPSAT | IMUTANT<br>2.0 | IMUTANT<br>3.0 | POPMUSIC<br>3.1 | ENCOM | FOLDX | BEATMU<br>SIC | mCSM  |
|-----------|-------------------------------------------|-----------------------------------------|--------|----------------|----------------|-----------------|-------|-------|---------------|-------|
| A4V       | 1.62                                      | 4.31                                    | 2.24   | 1.09           | 0.81           | -0.49           | -1.16 | 0.44  | -1.31         | -0.1  |
| I18V      | 0.37                                      |                                         | 2.54   | 0.69           | 1.07           | 1.38            | 0.56  | 0.27  | 0.07          | -1.38 |
| V29A      | 2.81                                      |                                         | 5.16   | 1.69           | 1.96           | 2.65            | 0.56  | 1.36  | 1             | -2.4  |
| V31A      | 1.39                                      |                                         | 5.04   | 2.05           | 2.08           | 3.39            | 0.44  | 0.66  | 1.53          | -1.59 |
| I35V      | 0.66                                      |                                         | 2.36   | 0.43           | 0.78           | 1.39            | 0.27  | 0.32  | 0.12          | -1.61 |
| L38A      | 2.95                                      |                                         | 4.38   | 2.3            | 2.26           | 3.02            | 0.48  | 1.42  | 1.3           | -2.65 |
| L38V      | 2.25                                      | 3.24                                    | 2.41   | 0.64           | 1.06           | 1.54            | -0.02 | 1.73  | 0.15          | -1.76 |
| G41S      | 2.93                                      | 4.47                                    | 2.07   | 2.36           | 1.19           | 2.32            | -0.1  | 1.28  | 1.38          | -1.01 |
| G41D      | 2.91                                      | 3.47                                    | 2.51   | 1.76           | 1.09           | 2.35            | -0.07 | 0.71  | 1.29          | -1.43 |
| H43R      | 2.68                                      | 4.05                                    | -4.33  | 1.39           | 0.59           | 1.61            | 0.18  | 1.68  | 0.08          | -1.99 |
| F45A      | 2.07                                      |                                         | 7.3    | 1.39           | 1.28           | 3.9             | 1.17  | 2.13  | 2.01          | -2.8  |
| H46R      | -0.81                                     | -0.48                                   | -3.67  | 0.74           | 0.65           | 1.13            | -0.24 | 1.75  | -0.19         | -1.9  |
| V47A      | 1.45                                      |                                         | 6.57   | 1.05           | 1.27           | 2.98            | 0.4   | 1.16  | 1.44          | -2.69 |
| F64A      | -0.2                                      |                                         | 2.75   | 2.57           | 2.14           | 2.8             | 1.28  | 0.93  | 1.02          | -3.14 |
| D76Y      | 0.21                                      | 0.09                                    | -0.92  | 0.56           | 0.32           | 0.88            | -0.31 | 0.05  | 0.71          | -0.31 |
| D76V      | 0.2                                       | 0.06                                    | -0.32  | -0.03          | 0.42           | 0.25            | 0.29  | 0.28  | -0.03         | -0.03 |
| V81A      | 0.01                                      |                                         | 4.8    | 1.56           | 1.56           | 1.93            | 0.83  | 0.74  | 0.59          | -2.49 |
| L84A      | 1.85                                      |                                         | 4.54   | 1.85           | 1.79           | 2.72            | 1.04  | 1.21  | 1.11          | -2.66 |
| L84V      | 1.87                                      | 2.65                                    | 3.21   | 0.74           | 1.04           | 1.31            | 0.21  | 0.89  | 0.03          | -1.62 |
| G85R      | 1.93                                      | 0.9                                     | 6.96   | 0.76           | 0.63           | 2.01            | -0.92 | 1.79  | 0.74          | -1.27 |
| N86S      | -0.07                                     | 0.45                                    | -0.95  | 1.59           | 0.51           | 0.66            | -0.1  | 0.49  | -0.15         | -1.05 |
| N86D      | -0.05                                     | 0.94                                    | -2.21  | 0.79           | 0.28           | 0.96            | -0.28 | 0.79  | 0.17          | -0.97 |
| N86K      | 0.66                                      | 1.41                                    | -0.09  | 0.34           | 0.1            | 0.74            | -0.8  | -0.06 | 0.01          | -0.29 |
| V87A      | 1.61                                      |                                         | 3.62   | 1.89           | 1.63           | 2.44            | 0.56  | 0.93  | 0.85          | -1.99 |
| D90V      | 1.41                                      | 1.85                                    | 1.47   | 0.65           | 0              | 0.83            | 0.05  | 0.95  | 0.5           | 0.07  |
| D90A      | 0.66                                      | 0.65                                    | 1.95   | 0.5            | -0.42          | 0.93            | 0.18  | 0.82  | 0.56          | -0.27 |
| G93V      | 7                                         | 5.4                                     | 1.02   | 0.23           | 0.92           | 2.7             | -0.46 | 2.19  | 1.09          | -0.71 |
| G93A      | 2.43                                      | 2.98                                    | 2.17   | 1.36           | 1.28           | 2.66            | 0.1   | 1.15  | 1.12          | -0.9  |
| G93R      | 4.4                                       | 3                                       | 1.07   | 1.19           | 0.72           | 1.97            | -0.23 | 1.24  | 0.61          | -0.88 |
| G93D      | 5.7                                       | 4.5                                     | 0.42   | 1.88           | 1.24           | 2.24            | -0.31 | 1.9   | 0.82          | -2.0  |
| G93S      | 3.7                                       | 3.1                                     | 2.76   | 0.71           | 0.36           | 2.14            | -0.35 | 1.24  | 0.64          | -1.36 |
| V97A      | 2.9                                       |                                         | 6.35   | 1.53           | 1.67           | 2.55            | 0.33  | 1.13  | 0.83          | -1.69 |
| E100G     | 0.91                                      | 2.22                                    | 4.18   | 1.19           | 1              | 0.74            | 0.41  | 0.35  | 0.65          | -0.74 |
| D101G     | 0.72                                      | 1.39                                    | -1.22  | 2.62           | 1.8            | 1.66            | 0.22  | 1.78  | 0.26          | -0.95 |
| D101N     | -0.8                                      | -0.75                                   | 0.12   | 1.8            | 1.65           | 0.79            | -0.02 | 1.13  | -0.37         | -0.88 |
| I104A     | 1.53                                      |                                         | 2.56   | 2.26           | 2.28           | 2.94            | 0.79  | 1.13  | 1             | -2.62 |
| I104F     | 0.72                                      | 1.24                                    | 4.02   | 1.07           | 1.4            | 0.85            | -0.82 | 3.5   | -0.46         | -1.6  |
| S105L     | 1.81                                      | 2.6                                     | -2.58  | 0.92           | 0.72           | 0.91            | 0.06  | 0.63  | -0.25         | -0.35 |
| L106V     | 1.78                                      | 3.62                                    | 1.95   | 1.18           | 1.27           | 1.08            | 0.54  | 0.96  | -0.06         | -1.44 |
| L106A     | 3.71                                      |                                         | 5.37   | 2.46           | 2.25           | 2.29            | 1.49  | 1.56  | 0.62          | -2.32 |
| C111A     | -0.42                                     |                                         | -4.89  | 0.33           | 1.22           | 1.36            | 0.1   | -0.06 | 0.37          | -1.48 |
| I112A     | 1.25                                      |                                         | 7.19   | 2.35           | 1.91           | 2.38            | 0.66  | 1.32  | 0.88          | -2.3  |
| I113T     | 1.25                                      | 2.48                                    | 2.11   | 2.27           | 1.28           | 1.71            | 0.31  | 0.92  | 1.17          | -1.86 |
| G114A     | 2.33                                      | 3.27                                    | 5.21   | 0.51           | 0.86           | 2.27            | 0.02  | 1.39  | 2.18          | -1.17 |
| L117A     | 1.78                                      |                                         | 5.05   | 1.71           | 1.3            | 3.29            | 0.82  | 1.53  | 1.49          | -2.98 |
| V119A     | 2.55                                      |                                         | 4.25   | 0.84           | 1.02           | 3.64            | 0.5   | 0.99  | 1.75          | -2.55 |
| N139K     | 0.06                                      | 0.24                                    | 0.9    | 0.76           | 0.24           | 1.65            | -0.47 | 0.33  | 0.79          | 0.62  |
| N139D     | 0.01                                      | -0.36                                   | 1.08   | 0.26           | -0.04          | 1               | -0.38 | 0.85  | 0.23          | -1.79 |

|              |       |      |       |      |      |      |       |      |       |       |
|--------------|-------|------|-------|------|------|------|-------|------|-------|-------|
| <b>L144F</b> | 0.23  | 1.89 | -0.69 | 1.04 | 1.22 | 0.58 | -0.46 | 0.31 | -0.19 | -1.59 |
| <b>L144S</b> | 0.2   | 1.07 | 0.64  | 0.98 | 0.88 | 1.3  | 0.46  | 0.76 | 0.37  | -2.22 |
| <b>L144A</b> | -0.13 |      | 0.32  | 0.62 | 0.58 | 1.47 | 0.74  | 0.47 | 0.53  | -2.25 |
| <b>V148G</b> | 2.53  | 4.56 | -0.65 | 3.38 | 2.21 | 2.26 | 0.79  | 0.17 | 2.89  | -1.0  |

**Table S4.** Experimental monomer and dimer stability changes and computed stability changes (kcal/mol) for 2XJK.

| Mutations | $\Delta\Delta G(\text{exp})$<br>(monomer) | $\Delta\Delta G(\text{exp})$<br>(dimer) | CUPSAT | IMUTANT<br>2.0 | IMUTANT<br>3.0 | POPMUSIC<br>3.1 | ENCOM | FOLDX | mCSM  |
|-----------|-------------------------------------------|-----------------------------------------|--------|----------------|----------------|-----------------|-------|-------|-------|
| A4V       | 1.62                                      | 4.31                                    | -3.8   | -0.94          | -0.61          | -0.36           | -0.68 | 0.39  | 0.14  |
| I18V      | 0.37                                      |                                         | -2.56  | -0.62          | -1.06          | 1.24            | -0.1  | 0.32  | -1.43 |
| V29A      | 2.81                                      |                                         | -5.24  | -1.64          | -1.78          | 2.65            | 0.58  | 1.22  | -2.49 |
| V31A      | 1.39                                      |                                         | -4.34  | -2.09          | -1.95          | 3.14            | 0.27  | 1.46  | -1.76 |
| I35V      | 0.66                                      |                                         | -2.41  | -0.27          | -0.82          | 1.38            | 0.19  | 0.5   | -1.76 |
| L38A      | 2.95                                      |                                         | -3.38  | -2.35          | -2.3           | 2.8             | 0.61  | 1.52  | -2.74 |
| L38V      | 2.25                                      | 3.24                                    | -2.81  | -0.68          | -1.07          | 1.26            | -0.02 | 1.81  | -1.82 |
| G41S      | 2.93                                      | 4.47                                    | -6.51  | -1.61          | -1.05          | 1.95            | -0.01 | 1.18  | -1.05 |
| G41D      | 2.91                                      | 3.47                                    | -7.06  | -2.15          | -1.1           | 2.22            | -0.08 | 0.65  | -1.52 |
| H43R      | 2.68                                      | 4.05                                    | 1.88   | -1.34          | -0.61          | 1.51            | -0.15 | 1.94  | -1.98 |
| F45A      | 2.07                                      |                                         | -6.7   | -1.3           | -1.17          | 4.02            | 1.16  | 2.58  | -3.07 |
| H46R      | -0.81                                     | -0.48                                   | 5.13   | -0.73          | -0.61          | 1.13            | 1.26  | 0.94  | -1.93 |
| V47A      | 1.45                                      |                                         | -2.83  | -1.33          | -1.28          | 3.32            | 0.49  | 1.28  | -2.98 |
| F64A      | -0.2                                      |                                         | -2.24  | -2.41          | -2.1           | 3.01            | 1.39  | 1.45  | -3.26 |
| D76Y      | 0.21                                      | 0.09                                    | 0.89   | 0.16           | -0.36          | 0.67            | -0.67 | 0     | -0.24 |
| D76V      | 0.2                                       | 0.06                                    | 1.07   | -0.39          | -0.25          | 0.2             | -0.06 | 0     | -0.07 |
| V81A      | 0.01                                      |                                         | -4.24  | -1.65          | -1.65          | 2.02            | 0.93  | 0.5   | -2.19 |
| L84A      | 1.85                                      |                                         | -3.87  | -1.85          | -1.79          | 2.8             | 1.24  | 1.37  | -2.75 |
| L84V      | 1.87                                      | 2.65                                    | -1.7   | -0.74          | -1.04          | 1.39            | 0.18  | 1.37  | -1.71 |
| G85R      | 1.93                                      | 0.9                                     | -3.95  | -0.7           | -0.63          | 2.32            | -0.76 | 1.61  | -1.23 |
| N86S      | -0.07                                     | 0.45                                    | -2.36  | -0.36          | -0.09          | 0.52            | 0.24  | 0.45  | -1.01 |
| N86D      | -0.05                                     | 0.94                                    | -1.54  | -1.68          | -0.54          | 1.1             | 0.12  | 0.89  | -0.84 |
| N86K      | 0.66                                      | 1.41                                    | 1.67   | -0.86          | -0.29          | 0.85            |       |       | -0.26 |
| V87A      | 1.61                                      |                                         | -3.36  | -1.81          | -1.61          | 2.34            | 0.65  | 0.93  | -2.1  |
| D90V      | 1.41                                      | 1.85                                    | -2.33  | -0.39          | 0.5            | 0.73            | 0.22  | 0.67  | 0.13  |
| D90A      | 0.66                                      | 0.65                                    | -1.22  | -0.43          | 0.15           | 0.7             | 0.07  | 0.57  | -0.21 |
| G93V      | 7                                         | 5.4                                     | -3.24  | -0.93          | -0.55          | 2.93            | -0.34 | 3.01  | -0.65 |
| G93A      | 2.43                                      | 2.98                                    | -1.76  | -0.48          | -1.05          | 2.83            | 0.1   | 1.57  | -0.81 |
| G93R      | 4.4                                       | 3                                       | -2.53  | -1.29          | -0.84          | 2.06            | -0.26 | 2.39  | -0.78 |
| G93D      | 5.7                                       | 4.5                                     | -2.47  | -1.93          | -1.32          | 2.43            | -0.27 | 2.81  | -1.81 |
| G93S      | 3.7                                       | 3.1                                     | -3.03  | -1.64          | -1.44          | 2.47            | -0.38 | 2.09  | -1.24 |
| V97A      | 2.9                                       |                                         | -5.27  | -1.82          | -1.75          | 2.64            | 0.46  | 1.17  | -1.71 |
| E100G     | 0.91                                      | 2.22                                    | -3.05  | -1.92          | -1.27          | 1.06            | 0.74  | 0.31  | -0.56 |
| D101G     | 0.72                                      | 1.39                                    | -0.18  | -3.07          | -1.98          | 1.56            | 0.29  | 1.68  | -0.85 |
| D101N     | -0.8                                      | -0.75                                   | -0.3   | -2.01          | -1.79          | 0.71            | 0.48  | 1.27  | -0.82 |
| I104A     | 1.53                                      |                                         | -1.17  | -2.16          | -2.4           | 2.85            | 0.63  | 1.35  | -2.25 |
| I104F     | 0.72                                      | 1.24                                    | -2.69  | -0.91          | -1.42          | 0.74            | -0.65 | 4.72  | -1.36 |
| S105L     | 1.81                                      | 2.6                                     | -1.38  | -0.72          | -0.61          | 0.93            | -0.03 | 0.75  | -0.64 |
| L106V     | 1.78                                      | 3.62                                    | -1.81  | -1.06          | -1.12          | 0.92            | 0.77  | 1.2   | -1.5  |
| L106A     | 3.71                                      |                                         | -2.9   | -2.49          | -2.1           | 2.19            | 1.51  | 1.56  | -2.44 |
| I112A     | 1.25                                      |                                         | -1.3   | -2.81          | -2.14          | 2.4             | 0.83  | 1.34  | -2.28 |
| I113T     | 1.25                                      | 2.48                                    | -1.64  | -2.47          | -1.31          | 0.7             | 0.38  | 0.87  | -1.49 |
| G114A     | 2.33                                      | 3.27                                    | -1.61  | -0.37          | -0.53          | 1.76            | -0.08 | 1.13  | -0.61 |
| L117A     | 1.78                                      |                                         | -2.79  | -1.82          | -1.39          | 3.13            | 0.69  | 1.53  | -3.05 |
| V119A     | 2.55                                      |                                         | -3.63  | -0.78          | -0.84          | 3.63            | 0.49  | 1.32  | -2.79 |
| N139K     | 0.06                                      | 0.24                                    | -1.66  | -0.26          | 0.04           | 1.78            | 0.04  | 0.01  | 0.33  |
| N139D     | 0.01                                      | -0.36                                   | 0.49   | -0.76          | -0.24          | 1.05            | 0.01  | 0.6   | -1.54 |
| L144F     | 0.23                                      | 1.89                                    | 0.34   | -0.81          | -0.55          | 0.62            | -0.35 | 0.41  | -1.46 |



|              |       |      |       |       |       |      |      |      |       |
|--------------|-------|------|-------|-------|-------|------|------|------|-------|
| <b>L144S</b> | 0.2   | 1.07 | -1.67 | -1.19 | -0.88 | 1.23 | 0.56 | 0.77 | -1.86 |
| <b>L144A</b> | -0.13 |      | 0.27  | -1.26 | -1.25 | 1.56 | 0.8  | 0.71 | -1.98 |
| <b>V148G</b> | 2.53  | 4.56 | -2.01 | -2.42 | -1.81 | 0.52 | 0.12 | 0.14 | -0.96 |
| <b>I149A</b> | 4.05  |      | -2.71 | -3.37 | -2.13 | 2.61 | 0.99 | 1.62 | -2.34 |
| <b>I149V</b> | 0.27  |      | -1.67 | -0.42 | -0.56 | 1.09 | 0.2  | 0.39 | -1.16 |

**Table S5.** Experimental monomer and dimer stability changes and computed stability changes (kcal/mol) for 4BCZ.

| Mutations | $\Delta\Delta G_{(\text{exp})}$<br>(monomer) | $\Delta\Delta G_{(\text{exp})}$<br>(dimer) | CUPSAT | IMUTANT<br>2.0 | I-MUTANT<br>3.0 | POPMUSIC<br>3.1 | ENCeM | FoldX | BEATMU<br>SIC | mCSM  |
|-----------|----------------------------------------------|--------------------------------------------|--------|----------------|-----------------|-----------------|-------|-------|---------------|-------|
| A4V       | 1.62                                         | 4.31                                       | -0.39  | -0.91          | -0.68           | -0.44           | -0.96 | 0.3   | -1.47         | 0.04  |
| I18V      | 0.37                                         |                                            | -2.38  | -0.58          | -1.02           | 1.37            | 0.14  | 0.27  | 0.03          | -1.21 |
| V29A      | 2.81                                         |                                            | -5.99  | -1.26          | -1.7            | 2.6             | 0.52  | 1.15  | 1.05          | -2.4  |
| V31A      | 1.39                                         |                                            | -7.38  | -2.13          | -1.9            | 3.47            | 0.49  | 1.45  | 1.71          | -2.22 |
| I35V      | 0.66                                         |                                            | -2.22  | -0.22          | -0.72           | 1.44            | 0.2   | 0.48  | 0.16          | -2.02 |
| L38A      | 2.95                                         |                                            | -2.97  | -1.76          | -1.79           | 2.3             | 0.82  | 1.59  | 0.81          | -2.67 |
| L38V      | 2.25                                         | 3.24                                       | -0.81  | -0.58          | -0.88           | 1.21            | 0.1   | 1.65  | 0             | -1.8  |
| G41S      | 2.93                                         | 4.47                                       | -1.35  | -1.7           | -0.86           | 2.43            | -0.14 | 1.08  | 1.3           | -1.22 |
| G41D      | 2.91                                         | 3.47                                       | -0.8   | -2.45          | -1              | 2.54            | -0.11 | 0.47  | 1.39          | -1.64 |
| H43R      | 2.68                                         | 4.05                                       | 3.11   | -1.25          | -0.46           | 1.34            | 0.44  | 2.59  | 0.01          | -1.82 |
| F45A      | 2.07                                         |                                            | -5.71  | -1.86          | -1.32           | 3.58            | 1.27  | 2.54  | 1.68          | -2.66 |
| H46R      | -0.81                                        | -0.48                                      | 2.02   | -0.74          | -0.48           | 0.56            | 0.27  | -0.16 | -0.24         | -1.38 |
| V47A      | 1.45                                         |                                            | -4.29  | -1.35          | -1.39           | 2.06            | 0.58  | 0.99  | 0.46          | -2.21 |
| L84A      | 1.85                                         |                                            | -0.29  | -2.44          | -2.05           | 2.84            | 1.51  | 1.32  | 1.19          | -2.19 |
| L84V      | 1.87                                         | 2.65                                       | 0.46   | -0.87          | -1.1            | 1.42            | 0.64  | 1.16  | 0.13          | -1.31 |
| G85R      | 1.93                                         | 0.9                                        | 0.24   | -0.46          | -0.67           | 2.05            | -0.01 | 1.3   | 1.28          | -0.73 |
| N86S      | -0.07                                        | 0.45                                       | 1.52   | -0.46          | -0.05           | 0.01            | 0.14  | 0.2   | -0.06         | -0.32 |
| N86D      | -0.05                                        | 0.94                                       | 0.33   | -1.66          | -0.43           | 0.32            | -0.13 | 0.15  | 0.18          | 0.25  |
| N86K      | 0.66                                         | 1.41                                       | 0.31   | -1.28          | -0.29           | 0.29            |       |       | 0.11          | 0.13  |
| V87A      | 1.61                                         |                                            | -2.5   | -1.05          | -1.27           | 2.32            | 0.64  | 0.85  | 0.78          | -2.22 |
| D90V      | 1.41                                         | 1.85                                       | -1.9   | -0.43          | 0.47            | 0.97            | -0.06 | 1.07  | 0.47          | 0.03  |
| D90A      | 0.66                                         | 0.65                                       | -2.11  | -0.55          | 0.07            | 0.98            | 0.06  | 0.68  | 0.48          | -0.3  |
| G93V      | 7                                            | 5.4                                        | -3.86  | -1.21          | -0.42           | 2.68            | -0.35 | 2.35  | 1.11          | -0.66 |
| G93A      | 2.43                                         | 2.98                                       | -2.61  | -0.7           | -0.9            | 2.62            | 0.02  | 1.21  | 1.05          | -0.84 |
| G93R      | 4.4                                          | 3                                          | -3.7   | -1.37          | -0.69           | 1.99            | -0.33 | 1.46  | 0.57          | -0.81 |
| G93D      | 5.7                                          | 4.5                                        | -1.98  | -2.16          | -1.19           | 2.22            | -0.33 | 1.82  | 0.76          | -1.85 |
| G93S      | 3.7                                          | 3.1                                        | -3.56  | -1.59          | -1.22           | 2.07            | -0.53 | 1.61  | 0.64          | -1.28 |
| V97A      | 2.9                                          |                                            | -4.89  | -1.5           | -1.58           | 2.61            | 0.24  | 1.15  | 0.97          | -2.02 |
| E100G     | 0.91                                         | 2.22                                       | -1     | -1.58          | -1.02           | 0.79            | 0.65  | 0.35  | 0.7           | -0.96 |
| D101G     | 0.72                                         | 1.39                                       | 0.48   | -2.77          | -1.56           | 1.71            | 0.11  | 0.6   | 0.48          | -0.86 |
| D101N     | -0.8                                         | -0.75                                      | -0.25  | -1.77          | -1.51           | 0.74            | -0.03 | -0.18 | -0.22         | -0.76 |
| I104A     | 1.53                                         |                                            | -1.7   | -2.33          | -2.11           | 2.18            | 0.7   | 0.91  | 0.69          | -2.01 |
| I104F     | 0.72                                         | 1.24                                       | -4.09  | -1.23          | -1.34           | 0.51            | -0.84 | 3.89  | -0.56         | -1.26 |
| S105L     | 1.81                                         | 2.6                                        | 4.62   | -0.36          | -0.3            | 0.94            | -0.11 | 0.35  | -0.12         | -0.79 |
| L106V     | 1.78                                         | 3.62                                       | -2.57  | -1.31          | -1.34           | 1.18            | 0.63  | 1.5   | -0.1          | -1.67 |
| L106A     | 3.71                                         |                                            | -4.21  | -2.4           | -2.3            | 2.31            | 1.51  | 1.46  | 0.81          | -2.45 |
| I112A     | 1.25                                         |                                            | -5.96  | -2.54          | -1.85           | 2.2             | 0.75  | 1.25  | 0.55          | -2.31 |
| I113T     | 1.25                                         | 2.48                                       | -6.58  | -2.94          | -1.56           | 1.06            | 0.95  | 0.38  | 0.19          | -1.37 |
| G114A     | 2.33                                         | 3.27                                       | 1.77   | -0.46          | -0.79           | 1.33            | -0.01 | 1.3   | 1.02          | -0.26 |
| L117A     | 1.78                                         |                                            | -4.37  | -1.56          | -1.26           | 3.14            | 0.72  | 1.71  | 1.35          | -2.81 |
| V119A     | 2.55                                         |                                            | -2.85  | -0.82          | -0.92           | 3.1             | 0.41  | 1.43  | 1.33          | -2.62 |
| L144F     | 0.23                                         | 1.89                                       | -0.38  | -1.12          | -0.69           | 0.23            | 0.15  | -0.17 | -0.25         | -1.22 |
| L144S     | 0.2                                          | 1.07                                       | 1.25   | -1.36          | -1.17           | 0.92            | 0.15  | 0.96  | 0.27          | -1.25 |
| L144A     | -0.13                                        |                                            | 0.54   | -1.74          | -1.55           | 1.29            | 0.33  | 0.73  | 0.54          | -1.52 |
| V148G     | 2.53                                         | 4.56                                       | -0.32  | -3.06          | -2.2            | 0.59            | 0.15  | 0.12  | 0.4           | -0.57 |
| I149A     | 4.05                                         |                                            | -2.63  | -2.61          | -2.15           | 2.71            | 0.98  | 1.64  | 1.06          | -2.31 |
| I149V     | 0.27                                         |                                            | -2.08  | -0.2           | -0.68           | 1.04            | 0.19  | 0.44  | -0.19         | -1.18 |

**Table S6.** Bland Altman analysis of mean differences between experimental and computed stability predictors

| <b>PDB</b>    | <b>Stability Predictors</b> | <b>Bias</b> | <b>SD of Bias</b> | <b>Mean <math>\pm</math> 1.96 SD</b> |
|---------------|-----------------------------|-------------|-------------------|--------------------------------------|
| Dimer/Monomer |                             | 0.519091    | 0.983846          | 2.44; -1.40                          |
| 2C9V          | CUPSAT                      | 0.228519    | 2.37008           | 4.87; -4.41                          |
|               | I-Mutant 2.0                | -0.276667   | 1.59319           | 2.85; -3.39                          |
|               | I-Mutant 3.0                | -0.464630   | 1.55982           | 2.84; -3.40                          |
|               | PoPMuSiC 3.1                | 0.230185    | 1.38360           | 2.94; -2.48                          |
|               | ENCoM                       | -1.33296    | 1.68868           | 1.98; -4.64                          |
|               | FoldX                       | -0.453889   | 1.41646           | 2.32; -3.23                          |
|               | BeatMusic                   | -0.969815   | 1.41701           | 1.81; -3.75                          |
|               | mCSM                        | -3.22093    | 1.92398           | 0.55; -6.99                          |
| 1HL4          | CUPSAT                      | 0.511154    | 2.91821           | 6.23; -5.21                          |
|               | I-Mutant 2.0                | -0.283077   | 1.61560           | 2.88; -3.45                          |
|               | I-Mutant 3.0                | -0.465192   | 1.57707           | 2.63; -3.56                          |
|               | PoPMuSiC 3.1                | 0.241154    | 1.39334           | 2.97; -2.49                          |
|               | ENCoM                       | -1.38808    | 1.67719           | 1.90; -4.67                          |
|               | FoldX                       | -0.537115   | 1.40872           | 2.22; -3.30                          |
|               | BeatMusic                   | -0.915000   | 1.45559           | 1.94; -3.77                          |
|               | mCSM                        | -3.07423    | 1.85555           | 0.56; -6.71                          |
| 2XJK          | CUPSAT                      | -3.80075    | 3.21343           | 2.50; -10.10                         |
|               | I-Mutant 2.0                | -2.97340    | 1.95576           | 0.86; -6.81                          |
|               | I-Mutant 3.0                | -2.66113    | 1.78681           | 0.84; -6.16                          |
|               | PoPMuSiC 3.1                | 0.170943    | 1.93553           | 3.96; -3.62                          |
|               | ENCoM                       | -1.36154    | 1.75475           | 2.08; -4.80                          |
|               | FoldX                       | -0.447692   | 1.34523           | 2.19; -3.08                          |

|      |              |           |         |              |
|------|--------------|-----------|---------|--------------|
|      | mCSM         | -3.11321  | 1.91271 | 0.63; -6.86  |
| 4BCZ | CUPSAT       | -3.61702  | 3.40870 | 3.06; -10.23 |
|      | I-Mutant 2.0 | -3.24787  | 1.89115 | 0.46; -6.95  |
|      | I-Mutant 3.0 | -2.93170  | 1.77633 | 0.55; -6.41  |
|      | PoPMuSiC 3.1 | -0.173404 | 1.30507 | 2.38; -2.73  |
|      | ENCoM        | -1.58239  | 1.67567 | 1.70; -4.87  |
|      | FoldX        | -0.780652 | 1.33171 | 1.83; -3.39  |
|      | BeatMusic    | -1.30787  | 1.38584 | 1.41; -4.02  |
|      | mCSM         | -3.22298  | 1.93226 | 0.56; -7.01  |

**Table S7.** Overall performance of stability predictors for 33 SOD1 holo-dimer mutants using four different crystal structures

| Methods      | Metrics        | Additivity Assumption <sup>a</sup> |      |      |      | Average |
|--------------|----------------|------------------------------------|------|------|------|---------|
|              |                | 2C9V                               | 1HL4 | 2XJK | 4BCZ |         |
| CUPSAT       | MAE            | 1.6                                | 1.75 | 3.21 | 2.6  | 2.3     |
|              | MSE            | 1.08                               | 1.14 | 3.73 | 3.19 | 2.28    |
|              | R              | 0.38                               | 0.17 | 0.53 | 0.23 | 0.33    |
|              | R <sup>2</sup> | 0.144                              | 0.03 | 0.28 | 0.05 | 0.13    |
| I-Mutant 2.0 | MAE            | 0.68                               | 0.68 | 2.2  | 1.91 | 1.36    |
|              | MSE            | 0.99                               | 1.00 | 3.26 | 3.75 | 2.25    |
|              | R              | 0.35                               | 0.34 | 0.3  | 0.23 | 0.3     |
|              | R <sup>2</sup> | 0.12                               | 0.11 | 0.09 | 0.05 | 0.09    |
| I-Mutant 3.0 | MAE            | 0.65                               | 0.65 | 1.28 | 2.09 | 1.17    |
|              | MSE            | 1.28                               | 1.31 | 2.93 | 3.26 | 2.19    |
|              | R              | 0.41                               | 0.4  | 0.31 | 0.2  | 0.33    |
|              | R <sup>2</sup> | 0.17                               | 0.16 | 0.1  | 0.04 | 0.12    |
| PoPMuSiC 3.1 | MAE            | 0.65                               | 0.62 | 0.69 | 0.61 | 0.64    |
|              | MSE            | 0.76                               | 0.75 | 0.85 | 1.21 | 0.89    |
|              | R              | 0.51                               | 0.5  | 0.38 | 0.45 | 0.46    |
|              | R <sup>2</sup> | 0.26                               | 0.25 | 0.14 | 0.2  | 0.21    |
| ENCoM        | MAE            | 1.13                               | 1.21 | 1.21 | 1.27 | 1.21    |
|              | MSE            | 2.15                               | 2.24 | 2.11 | 2.41 | 2.22    |
|              | R              | 0.001                              | 0.1  | 0.25 | 0.16 | 0.13    |
|              | R <sup>2</sup> | 0                                  | 0.01 | 0.06 | 0.02 | 0.02    |
| FoldX        | MAE            | 0.8                                | 0.73 | 0.73 | 0.66 | 0.73    |
|              | MSE            | 0.99                               | 1.09 | 0.97 | 1.46 | 1.13    |
|              | R              | 0.18                               | 0.19 | 0.32 | 0.37 | 0.26    |
|              | R <sup>2</sup> | 0.03                               | 0.03 | 0.1  | 0.13 | 0.07    |
| BeatMusic    | MAE            | 0.77                               | 0.81 |      | 0.96 | 0.85    |
|              | MSE            | 1.72                               | 1.66 |      | 2.10 | 1.83    |
|              | R              | 0.41                               | 0.37 |      | 0.25 | 0.34    |
|              | R <sup>2</sup> | 0.17                               | 0.14 |      | 0.06 | 0.12    |
| mCSM         | MAE            | 2.23                               | 2.15 | 2.05 | 2.13 | 2.14    |
|              | MSE            | 3.23                               | 3.19 | 3.11 | 3.34 | 3.22    |
|              | R              | 0.11                               | 0.16 | 0.16 | 0.25 | 0.17    |
|              | R <sup>2</sup> | 0.01                               | 0.03 | 0.02 | 0.06 | 0.03    |

<sup>a</sup> Additivity assumption: Calculated and multiplied by 2

**Table S8.** Computed stability changes (kcal/mol), averaged over all four structures.

| Mutations | CUPSAT | IMUT-2.0 | IMUT-3.0 | POPMUS<br>IC 3.1 | ENCoM  | FoldX | BEATMU<br>SIC | mCSM   |
|-----------|--------|----------|----------|------------------|--------|-------|---------------|--------|
| A4V       | -0.235 | 0.08     | 0.08     | -0.452           | -0.9   | 0.42  | -1.37         | -0.004 |
| I18V      | -0.04  | 0.07     | 0.02     | 1.38             | 0.2    | 0.3   | 0.13          | -1.4   |
| V29A      | -0.28  | 0.04     | 0.09     | 2.61             | 0.55   | 1.24  | 1             | -2.45  |
| V31A      | -0.57  | -0.03    | 0.08     | 3.4              | 0.4    | 1.25  | 1.63          | -2.01  |
| I35V      | 0.1    | 0.09     | 0.03     | 1.42             | 0.21   | 0.45  | 0.13          | -1.8   |
| L38A      | 0.23   | 0.13     | 0.11     | 2.76             | 0.64   | 1.57  | 1.12          | -2.67  |
| L38V      | 0.26   | 0.01     | 0.045    | 1.34             | 0.02   | 1.74  | 0.07          | -1.78  |
| G41D      | -0.65  | -0.3     | 0.02     | 2.4              | -0.09  | 0.7   | 1.33          | -1.57  |
| G41S      | -1.02  | 0.3      | 0.1      | 2.3              | -0.09  | 1.21  | 1.32          | -1.11  |
| H43R      | -0.54  | 0.03     | 0.032    | 1.45             | 0.16   | 1.84  | 0.05          | -1.96  |
| F45A      | 0.48   | -0.12    | -0.02    | 3.86             | 1.17   | 2.47  | 1.88          | -2.85  |
| H46R      | -0.1   | 0.002    | 0.05     | 0.96             | 0.18   | 1.36  | -0.22         | -1.78  |
| V47A      | 1.24   | -0.11    | -0.02    | 2.82             | 0.52   | 1.16  | 1.03          | -2.72  |
| F64A      | 1.09   | 0.91     | 0.73     | 2.85             | 1.29   | 1.21  | 1.04          | -3.23  |
| D76V      | 0.05   | -0.24    | 0.16     | 0.25             | 0.17   | 0.15  | -0.04         | 0.001  |
| D76Y      | -0.37  | 0.34     | 0.06     | 0.73             | -0.39  | -0.04 | 0.4           | -0.26  |
| V81A      | 2.54   | 0.52     | 0.5      | 2.02             | 0.9    | 0.7   | 0.6           | -2.4   |
| L84A      | 2.42   | 0.92     | 0.9      | 2.78             | 1.08   | 1.25  | 1.14          | -2.7   |
| L84V      | 1.08   | -0.03    | -0.02    | 1.4              | 0.32   | 1.12  | 0.096         | -1.58  |
| G85R      | 1.82   | 0.07     | -0.01    | 2.15             | -0.65  | 1.7   | 0.91          | -1.13  |
| N86D      | -1.23  | -0.42    | -0.1     | 0.9              | -0.04  | 0.68  | 0.2           | -0.62  |
| N86K      | 0.87   | -0.35    | -0.09    | 0.7              | -0.48  | 0.06  | 0.05          | -0.18  |
| N86S      | -0.31  | 0.62     | 0.23     | 0.5              | 0.12   | 0.45  | -0.08         | -0.85  |
| V87A      | 0.022  | 0.021    | 0.09     | 2.37             | 0.6    | 0.9   | 0.82          | -2.11  |
| D90A      | -0.06  | -0.002   | -0.16    | 0.85             | 0.125  | 0.63  | 0.52          | -0.27  |
| D90V      | -0.51  | 0.1      | 0.23     | 0.8              | 0.07   | 0.821 | 0.46          | 0.06   |
| G93A      | 0.43   | 0.45     | 0.19     | 2.72             | 0.07   | 1.35  | 1.11          | -0.84  |
| G93S      | -0.12  | -0.4     | -0.44    | 2.22             | -0.4   | 1.7   | 0.66          | -1.28  |
| G93R      | -0.54  | -0.05    | 0.007    | 1.98             | -0.27  | 1.76  | 0.56          | -0.81  |
| G93D      | -0.15  | -0.07    | 0.01     | 2.3              | -0.3   | 2.24  | 0.78          | -1.87  |
| G93V      | -0.94  | -0.36    | 0.25     | 2.76             | -0.4   | 2.57  | 1.11          | -0.66  |
| V97A      | -0.24  | -0.05    | -0.005   | 2.6              | 0.34   | 1.14  | 0.93          | -1.78  |
| E100G     | 0.52   | -0.26    | -0.05    | 0.83             | 0.52   | 0.3   | 0.66          | -1.05  |
| D101G     | -0.81  | -0.1     | 0.03     | 1.6              | 0.21   | 1.44  | 0.32          | -0.95  |
| D101N     | -0.62  | -0.03    | 0.005    | 0.71             | 0.09   | 0.8   | -0.34         | -0.93  |
| I104A     | 0.03   | 0.005    | 0.04     | 2.72             | 0.71   | 1.12  | 0.97          | -2.44  |
| I104F     | 0.54   | -0.01    | 0.02     | 0.71             | -0.68  | 3.98  | -0.47         | -1.48  |
| S105L     | 0.26   | 0.2      | 0.14     | 1.14             | -0.05  | 0.47  | -0.17         | -0.33  |
| L106V     | -0.1   | 0        | 0.02     | 1.04             | 0.69   | 1.25  | -0.09         | -1.49  |
| L106A     | -0.15  | 0.01     | 0.025    | 2.24             | 1.52   | 1.55  | 0.75          | -2.38  |
| C111A     | -4.09  | 0.4      | 1.2      | 1.42             | 0.08   | -0.02 | 0.26          | -1.63  |
| I112A     | 0.95   | -0.12    | -0.025   | 2.31             | 0.78   | 1.32  | 0.71          | -2.5   |
| I113T     | -1.58  | -0.23    | -0.09    | 1.24             | 0.56   | 0.7   | 0.8           | -1.95  |
| G114A     | 2.48   | 0.005    | 0.07     | 1.89             | -0.015 | 1.27  | 1.72          | -0.9   |
| L117A     | 0.53   | 0.04     | 0.007    | 3.24             | 0.73   | 1.58  | 1.46          | -2.98  |
| V119A     | 0.08   | 0.005    | 0.04     | 3.48             | 0.47   | 1.27  | 1.58          | -2.64  |
| N139D     | 1.28   | -0.08    | -0.11    | 1.01             | -0.11  | 0.77  | 0.26          | -1.75  |
| N139K     | -0.16  | 0.42     | 0.17     | 1.61             | -0.13  | 0.24  | 0.7           | 0.65   |
| L144A     | 0.12   | -0.4     | -0.4     | 1.43             | 0.66   | 0.66  | 0.5           | -1.97  |
| L144S     | 0.02   | -0.1     | -0.04    | 1.16             | 0.43   | 0.82  | 0.3           | -1.87  |
| L144F     | -0.44  | 0.1      | 0.34     | 0.48             | -0.24  | 0.2   | -0.21         | -1.4   |

|              |       |       |       |      |      |      |       |       |
|--------------|-------|-------|-------|------|------|------|-------|-------|
| <b>V148G</b> | -0.76 | 0.26  | 0.08  | 1.37 | 0.44 | 0.14 | 1.93  | -0.78 |
| <b>I149A</b> | 0.38  | -0.16 | -0.11 | 2.74 | 0.98 | 1.53 | 1.34  | -2.54 |
| <b>I149V</b> | 0.32  | 0.15  | 0.01  | 1.06 | 0.28 | 0.38 | -0.33 | -1.37 |

**Table S9.** Standard Deviations from average (kcal/mol) over all four structures (Structural Sensitivity).

| <b>Mutations</b> | <b>CUPSAT</b> | <b>IMUT-2.0</b> | <b>IMUT-3.0</b> | <b>POPMUS<br/>IC 3.1</b> | <b>FoldX</b> | <b>ENCoM</b> | <b>BEATM<br/>USIC</b> | <b>mCSM</b> |
|------------------|---------------|-----------------|-----------------|--------------------------|--------------|--------------|-----------------------|-------------|
| A4V              | 2.26          | 1               | 0.72            | 0.06                     | 0.82         | 0.18         | 0.07                  | 0.1         |
| I18V             | 2.43          | 0.67            | 1.1             | 0.1                      | 0.02         | 0.23         | 0.1                   | 0.12        |
| V29A             | 5.34          | 1.5             | 1.84            | 0.03                     | 0.08         | 0.02         | 0.05                  | 0.05        |
| V31A             | 5.4           | 2.08            | 2               | 0.15                     | 0.34         | 0.08         | 0.07                  | 0.35        |
| I35V             | 2.43          | 0.35            | 0.8             | 0.04                     | 0.07         | 0.03         | 0.02                  | 0.14        |
| L38A             | 3.45          | 2.2             | 2.2             | 0.28                     | 0.12         | 0.12         | 0.22                  | 0.04        |
| L38V             | 2.18          | 0.65            | 1.02            | 0.12                     | 0.07         | 0.05         | 0.06                  | 0.03        |
| G41D             | 3.95          | 2               | 1.07            | 0.12                     | 0.18         | 0.02         | 0.045                 | 0.1         |
| G41S             | 3.44          | 1.96            | 1.06            | 0.2                      | 0.09         | 0.05         | 0.043                 | 0.08        |
| H43R             | 3.11          | 1.32            | 0.57            | 0.11                     | 0.52         | 0.21         | 0.03                  | 0.08        |
| F45A             | 6.7           | 1.47            | 1.22            | 0.17                     | 0.2          | 0.06         | 0.14                  | 0.14        |
| H46R             | 3.84          | 0.74            | 0.6             | 0.24                     | 1.1          | 0.29         | 0.02                  | 0.23        |
| V47A             | 4.84          | 1.23            | 1.31            | 0.47                     | 0.1          | 0.07         | 0.42                  | 0.31        |
| F64A             | 2.35          | 2.35            | 2               | 0.11                     | 0.21         | 0.07         | 0.02                  | 0.07        |
| D76V             | 0.73          | 0.16            | 0.3             | 0.04                     | 0.11         | 0.17         | 0.01                  | 0.08        |
| D76Y             | 0.9           | 0.16            | 0.3             | 0.1                      | 0.09         | 0.2          | 0.3                   | 0.04        |
| V81A             | 4.88          | 1.53            | 1.52            | 0.07                     | 0.15         | 0.05         | 0.01                  | 0.14        |
| L84A             | 3.63          | 1.6             | 1.55            | 0.07                     | 0.06         | 0.09         | 0.04                  | 0.04        |
| L84V             | 1.9           | 0.78            | 1.05            | 0.07                     | 0.18         | 0.18         | 0.05                  | 0.16        |
| G85R             | 4.1           | 0.66            | 0.65            | 0.13                     | 0.29         | 0.37         | 0.26                  | 0.23        |
| N86D             | 0.94          | 1.25            | 0.38            | 0.34                     | 0.3          | 0.17         | 0.03                  | 0.5         |
| N86K             | 0.78          | 0.73            | 0.2             | 0.24                     | 0.12         | 0.32         | 0.04                  | 0.18        |
| N86S             | 1.47          | 1.02            | 0.3             | 0.3                      | 0.17         | 0.13         | 0.05                  | 0.3         |
| V87A             | 3             | 1.67            | 1.53            | 0.04                     | 0.03         | 0.03         | 0.03                  | 0.08        |
| D90A             | 1.65          | 0.49            | 0.26            | 0.11                     | 0.13         | 0.06         | 0.03                  | 0.04        |
| D90V             | 1.63          | 0.51            | 0.25            | 0.11                     | 0.2          | 0.1          | 0.03                  | 0.04        |
| G93A             | 2.7           | 1.04            | 1.17            | 0.08                     | 0.17         | 0.03         | 0.04                  | 0.04        |
| G93S             | 3.18          | 1.22            | 0.9             | 0.15                     | 0.32         | 0.07         | 0.03                  | 0.05        |
| G93R             | 2.7           | 1.28            | 0.77            | 0.05                     | 0.45         | 0.04         | 0.04                  | 0.04        |
| G93D             | 2.33          | 1.97            | 1.27            | 0.08                     | 0.4          | 0.02         | 0.03                  | 0.07        |
| G93V             | 2.65          | 0.72            | 0.74            | 0.09                     | 0.32         | 0.05         | 0.02                  | 0.03        |
| V97A             | 5             | 1.61            | 1.66            | 0.03                     | 0.03         | 0.08         | 0.07                  | 0.13        |
| E100G            | 2.75          | 1.5             | 1.1             | 0.13                     | 0.05         | 0.19         | 0.03                  | 0.53        |
| D101G            | 1.06          | 2.81            | 1.8             | 0.08                     | 0.49         | 0.06         | 0.11                  | 0.12        |
| D101N            | 0.85          | 1.86            | 1.66            | 0.06                     | 0.58         | 0.22         | 0.09                  | 0.19        |
| I104A            | 1.65          | 2.25            | 2.3             | 0.31                     | 0.16         | 0.06         | 0.22                  | 0.35        |
| I104F            | 4             | 1.06            | 1.4             | 0.12                     | 0.45         | 0.16         | 0.06                  | 0.18        |
| S105L            | 2.72          | 0.76            | 0.6             | 0.37                     | 0.24         | 0.08         | 0.05                  | 0.48        |
| L106V            | 2.09          | 1.19            | 1.25            | 0.09                     | 0.2          | 0.12         | 0.02                  | 0.11        |
| L106A            | 3.74          | 2.45            | 2.23            | 0.06                     | 0.06         | 0.02         | 0.09                  | 0.06        |
| C111A            | 0.8           | 0.07            | 0.02            | 0.06                     | 0.04         | 0.01         | 0.11                  | 0.15        |
| I112A            | 5             | 2.55            | 1.97            | 0.08                     | 0.04         | 0.09         | 0.13                  | 0.4         |
| I113T            | 3.18          | 2.48            | 1.34            | 0.4                      | 0.22         | 0.25         | 0.44                  | 0.68        |
| G114A            | 2.7           | 0.42            | 0.74            | 0.37                     | 0.1          | 0.04         | 0.5                   | 0.5         |
| L117A            | 4.16          | 1.74            | 1.33            | 0.12                     | 0.07         | 0.06         | 0.09                  | 0.1         |
| V119A            | 3.4           | 0.8             | 0.93            | 0.22                     | 0.17         | 0.04         | 0.18                  | 0.09        |
| N139D            | 0.75          | 0.48            | 0.09            | 0.02                     | 0.12         | 0.19         | 0.03                  | 0.16        |
| N139K            | 1.1           | 0.48            | 0.09            | 0.16                     | 0.17         | 0.24         | 0.09                  | 0.28        |
| L144A            | 0.46          | 1.1             | 1.03            | 0.1                      | 0.1          | 0.2          | 0.04                  | 0.28        |

|       |      |      |      |      |      |      |      |      |
|-------|------|------|------|------|------|------|------|------|
| L144S | 1.1  | 1.17 | 0.98 | 0.14 | 0.08 | 0.17 | 0.04 | 0.38 |
| L144F | 0.51 | 1.07 | 0.97 | 0.15 | 0.22 | 0.23 | 0.02 | 0.13 |
| V148G | 0.75 | 3.01 | 2.1  | 0.12 | 0.02 | 0.3  | 0.09 | 0.2  |
| I149A | 3.05 | 2.84 | 2    | 0.09 | 0.1  | 0.02 | 0.2  | 0.24 |
| I149V | 2.2  | 0.47 | 0.64 | 0.02 | 0.04 | 0.08 | 0.1  | 0.22 |

**Table S10.** SOD1 variants with experimentally known stabilities (kcal/mol) correlated against t(o), t(s), and t(d) (years).

| Mutations | $\Delta\Delta G(\text{exp})$<br>(monomer) | $\Delta\Delta G(\text{exp})$<br>(dimer) | t(o) | t(s) | t(d) | Reference |
|-----------|-------------------------------------------|-----------------------------------------|------|------|------|-----------|
| A4V       | 1.62                                      | 4.31                                    | 47.7 | 1.2  | 48.9 | 5         |
| L38V      | 2.25                                      | 3.24                                    | 41.1 | 2.4  | 43.5 | 6         |
| G41S      | 2.93                                      | 4.47                                    | 48.4 | 1    | 49.4 | 7         |
| G41D      | 2.91                                      | 3.47                                    | 45.2 | 14.1 | 59.3 | 8         |
| H43R      | 2.68                                      | 4.05                                    | 49.3 | 1.8  | 51.1 | 9         |
| D76Y      | 0.21                                      | 0.09                                    | 55   | 17   | 72   | 10        |
| D76V      | 0.2                                       | 0.06                                    | 46   | 18.8 | 64.8 | 11        |
| L84V      | 1.87                                      | 2.65                                    | 46.8 | 3.2  | 50   | 12        |
| G85R      | 1.93                                      | 0.9                                     | 55.5 | 6    | 61.5 | 13        |
| N86S      | -0.07                                     | 0.45                                    | 40.8 | 6.8  | 47.6 | 14        |
| N86K      | 0.66                                      | 1.41                                    | 58.2 | 1.7  | 59.9 | 15        |
| D90V      | 1.41                                      | 1.85                                    | 46   | 2.7  | 48.7 | 16        |
| D90A      | 0.66                                      | 0.65                                    | 48.6 | 8    | 56.6 | 17        |
| G93V      | 7                                         | 5.4                                     | 43.6 | 6    | 49.6 | 18        |
| G93A      | 2.43                                      | 2.98                                    | 46   | 3.1  | 49.1 | 19        |
| G93R      | 4.4                                       | 3                                       | 35   | 5.3  | 40.3 | 20        |
| G93D      | 5.7                                       | 4.5                                     | 39.3 | 8.8  | 48.1 | 21        |
| G93S      | 3.7                                       | 3.1                                     | 51.6 | 8    | 59.6 | 22        |
| E100G     | 0.91                                      | 2.22                                    | 47.3 | 4.7  | 52   | 8         |
| D101G     | 0.72                                      | 1.39                                    | 41   | 1.9  | 48.9 | 23        |
| D101N     | -0.8                                      | -0.75                                   | 40.1 | 2.3  | 42.4 | 24        |
| I104F     | 0.72                                      | 1.24                                    | 36.9 | 21.3 | 58.2 | 25        |
| S105L     | 1.81                                      | 2.6                                     | 48.7 | 3.5  | 52.2 | 26        |
| L106V     | 1.78                                      | 3.62                                    | 45.1 | 1.9  | 47   | 8         |
| I113T     | 1.25                                      | 2.48                                    | 54.1 | 6.8  | 60.9 | 27        |
| G114A     | 2.33                                      | 3.27                                    | 37.5 | 2.7  | 40   | 28        |
| L144F     | 0.23                                      | 1.89                                    | 52.4 | 11.8 | 64.2 | 29        |
| L144S     | 0.2                                       | 1.07                                    | 37   | 12.3 | 49.3 | 30        |
| V148G     | 2.53                                      | 4.56                                    | 43.1 | 2.1  | 45.2 | 31        |
| I149T     | 4.05                                      |                                         | 37.6 | 2.7  | 40.3 | 32        |

**Table S11.** SOD1 structures used for computation of mutant stabilities

| PDB  | Stoichiometry | R (Å) | Space Group | pH   | RMSD* | No. of residues |
|------|---------------|-------|-------------|------|-------|-----------------|
| 2C9V | Homo-2-mer    | 1.07  | P 1211      | 4.75 | -     | 306             |
| 1HL4 | Homo-2-mer    | 1.82  | C 121       | 8.0  | 0.35  | 306             |
| 2XJK | Monomer       | 1.45  | P 212121    | 6.0  | 0.29  | 153             |
| 4BCZ | Monomer       | 1.93  | P 65        | 4.0  | 11.16 | 110             |



\*RMSD with respect to 2C9V

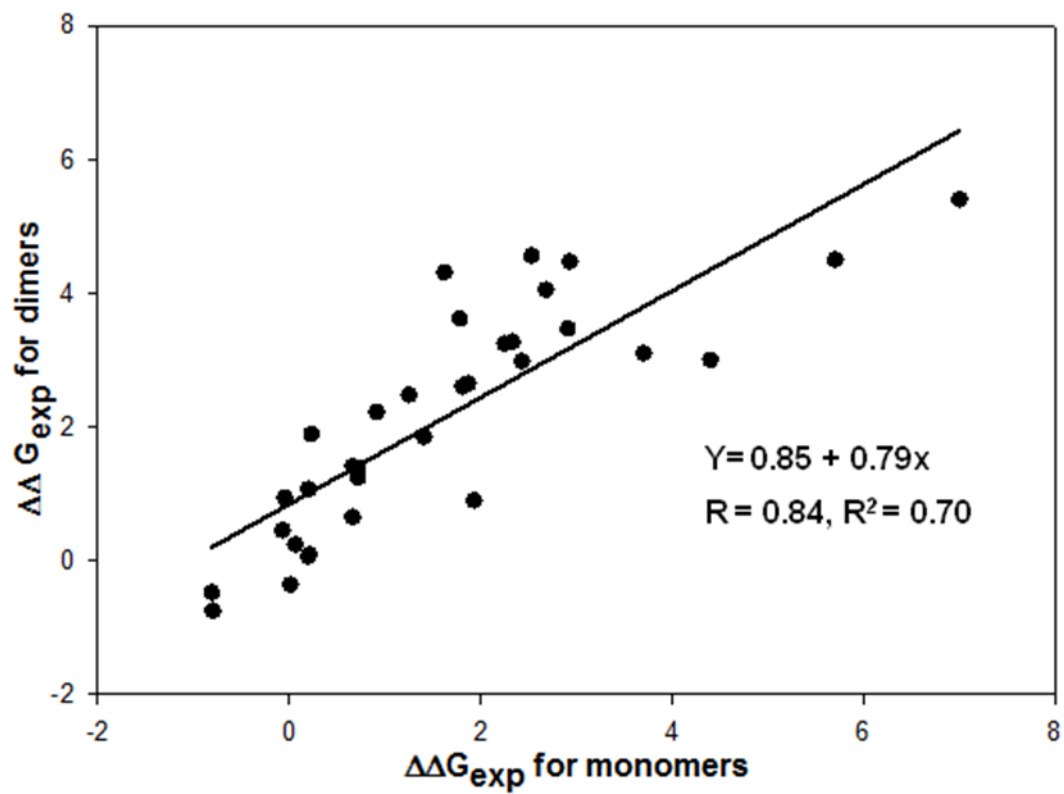

**Figure S1:** Correlation between experimental free energies (kcal/mol) of mutants for dimer and monomer SOD1.

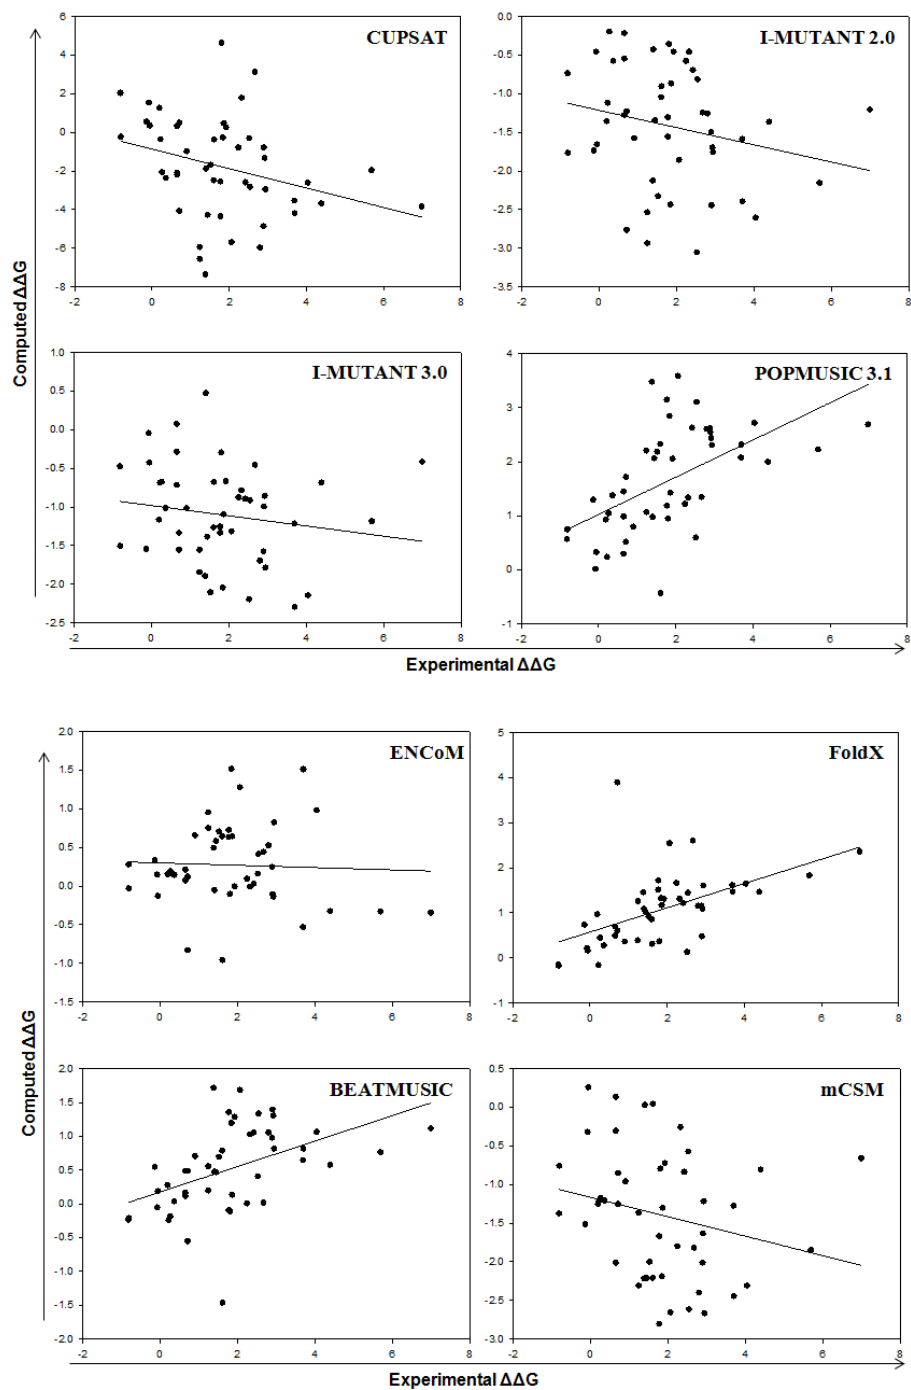

**Figure S2.** Correlation between experimental monomer and computed stability changes,  $\Delta\Delta G$  (kcal/mol) for 54 mutants using 4BCZ.

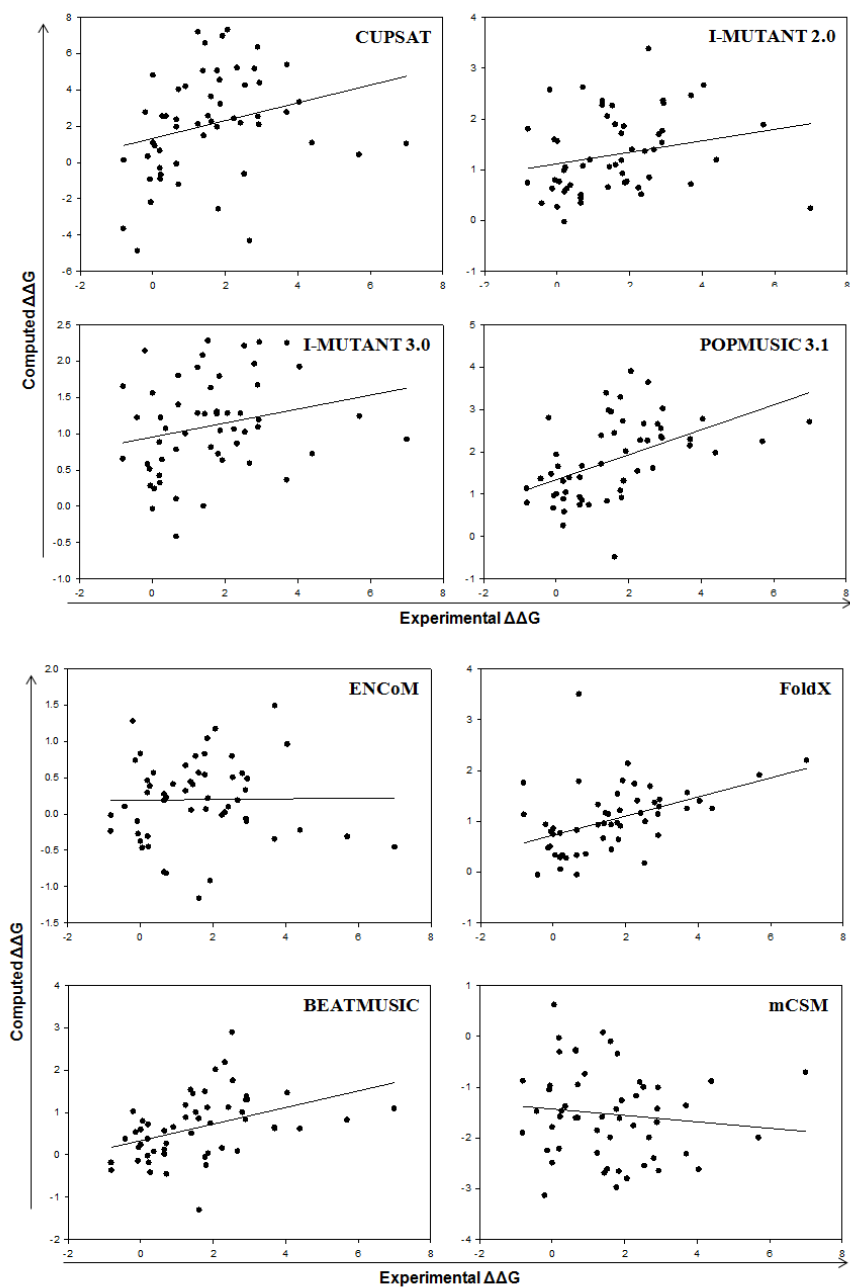

**Figure S3.** Correlation between experimental monomer and computed stability changes,  $\Delta\Delta G$  (kcal/mol) for 54 mutants using 1HL4.

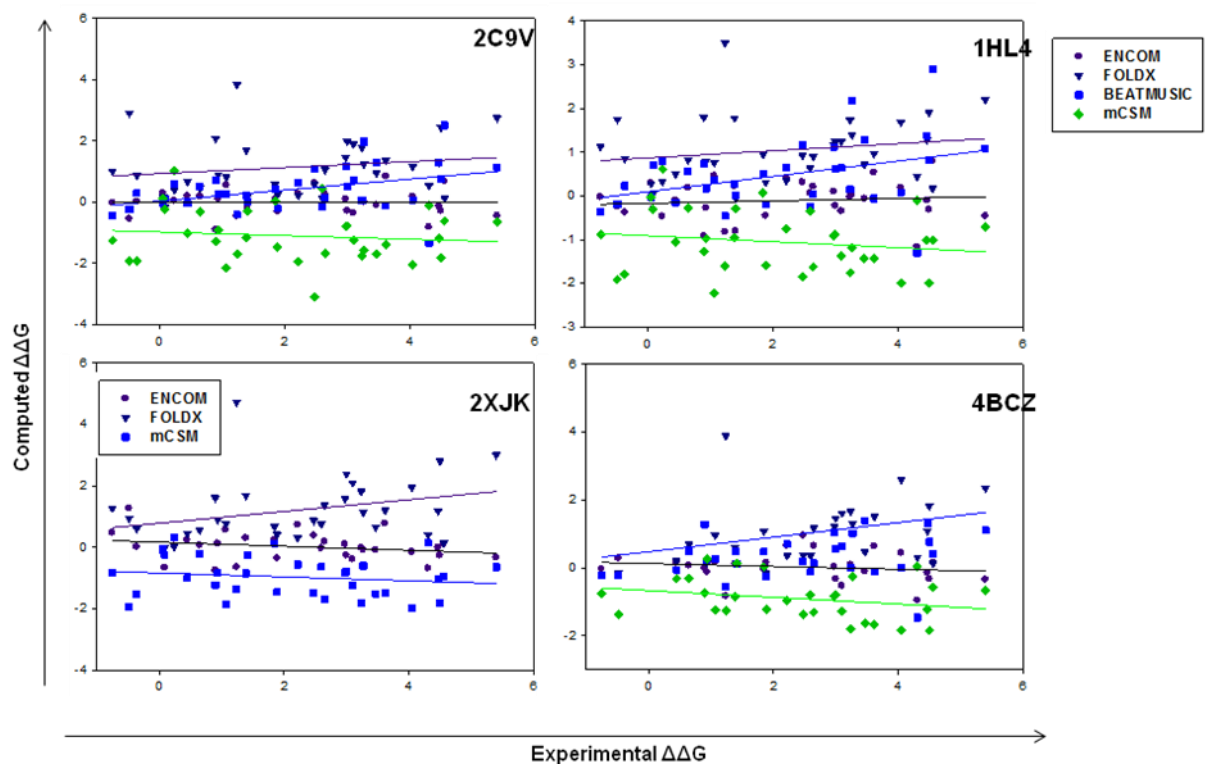

**Figure S4.** Correlation between experimental dimer and computed stability changes,  $\Delta\Delta G$  (kcal/mol) for 33 mutants using four different structures.

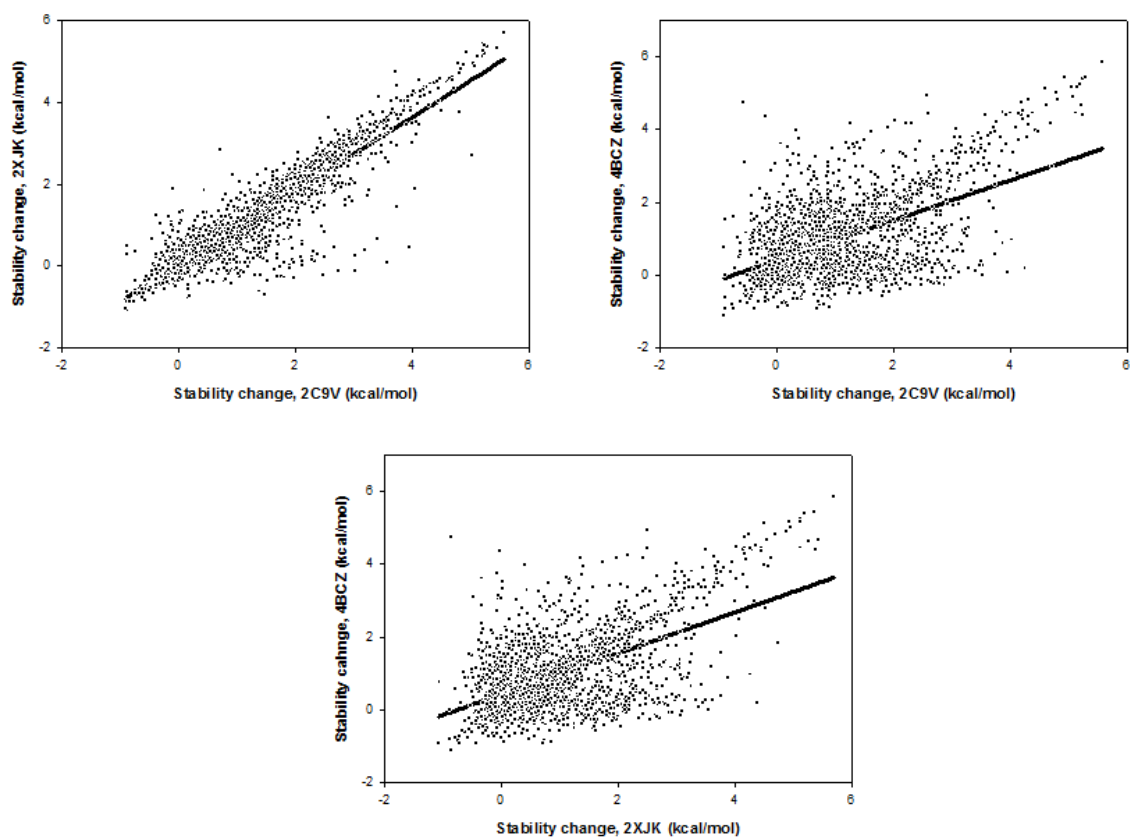

**Figure S5:** Correlation between predicted stability effects using PoPMuSiC 3.1 for all possible mutations in SOD1 using three different crystal structures (2C9V, 2XJK, and 4BCZ).

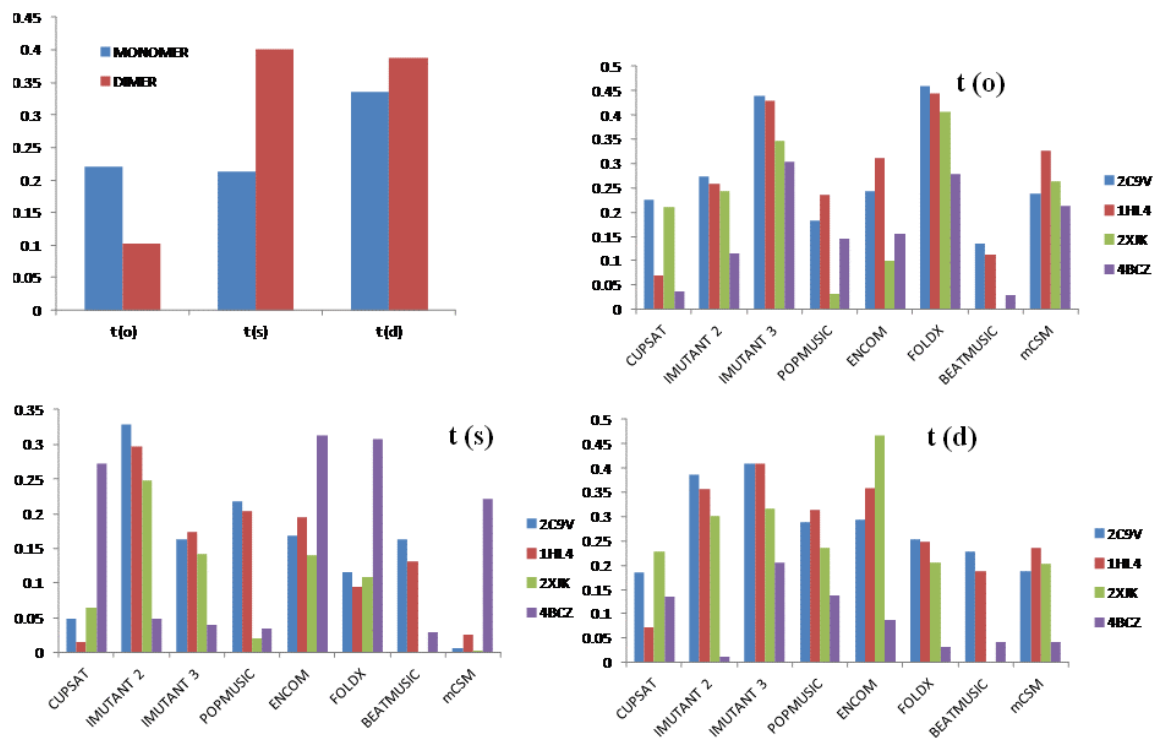

**Figure S6.** Comparative histograms for linear regression coefficient, R value between experimental  $\Delta\Delta G$  values and normalized patients data for 30 mutations (See also Table 2).

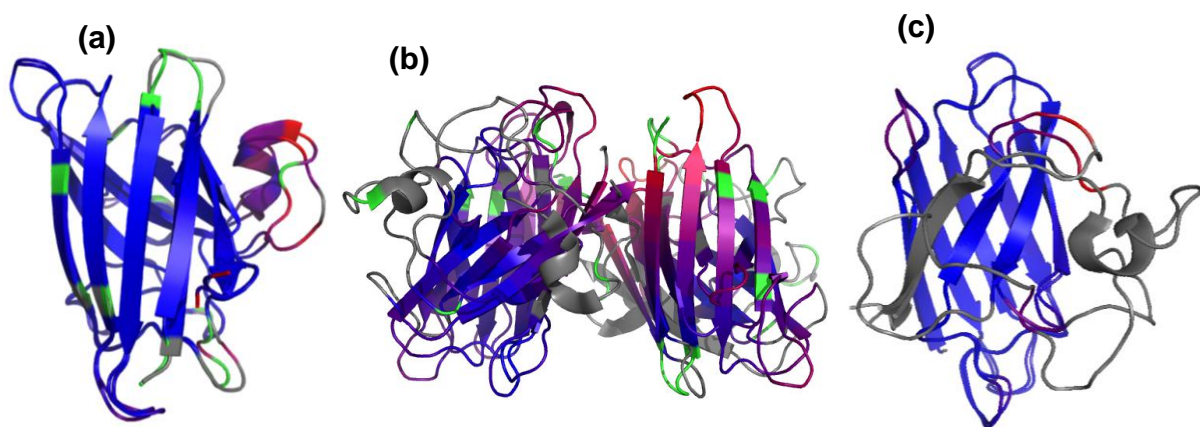

**Figure S7.** RMSD between different SOD1 structures. (a) 2C9V and 2XJK; (b) 2C9V and 4BCZ; (c) 2XJK and 4BCZ. Color coded are according to their RMSD values (Blue: low to Red: High).

## References:

- 1 Lindberg, M. J., Bystrom, R., Boknas, N., Andersen, P. M. & Oliveberg, M. Systematically perturbed folding patterns of amyotrophic lateral sclerosis (ALS)-associated SOD1 mutants. *Proc Natl Acad Sci U S A* 102, 9754-9759, doi:0501957102 10.1073/pnas.0501957102 (2005).
- 2 Nordlund, A. & Oliveberg, M. Folding of Cu/Zn superoxide dismutase suggests structural hotspots for gain of neurotoxic function in ALS: parallels to precursors in amyloid disease. *Proc Natl Acad Sci U S A* 103, 10218-10223, doi:0601696103 10.1073/pnas.0601696103 (2006).
- 3 Bystrom, R., Andersen, P. M., Grobner, G. & Oliveberg, M. SOD1 mutations targeting surface hydrogen bonds promote amyotrophic lateral sclerosis without reducing apo-state stability. *J Biol Chem* 285, 19544-19552, doi:10.1074/jbc.M109.086074 (2010).
- 4 Stathopoulos, P. B. *et al.* Calorimetric analysis of thermodynamic stability and aggregation for apo and holo amyotrophic lateral sclerosis-associated Gly-93 mutants of superoxide dismutase. *J Biol Chem* 281, 6184-6193, doi:M509496200 10.1074/jbc.M509496200 (2006).
- 5 Deng, H. X. *et al.* Amyotrophic lateral sclerosis and structural defects in Cu,Zn superoxide dismutase. *Science* 261, 1047-1051 (1993).
- 6 Aguirre, T., Matthijs, G., Robberecht, W., Tilkin, P. & Cassiman, J. J. Mutational analysis of the Cu/Zn superoxide dismutase gene in 23 familial and 69 sporadic cases of amyotrophic lateral sclerosis in Belgium. *Eur J Hum Genet* 7, 599-602, doi:10.1038/sj.ejhg.5200337 (1999).
- 7 Rainero, I. *et al.* SOD1 missense mutation in an Italian family with ALS. *Neurology* 44, 347-349 (1994).
- 8 Rosen, D. R. *et al.* Mutations in Cu/Zn superoxide dismutase gene are associated with familial amyotrophic lateral sclerosis. *Nature* 362, 59-62, doi:10.1038/362059a0 (1993).
- 9 DiDonato, M. *et al.* ALS mutants of human superoxide dismutase form fibrous aggregates via framework destabilization. *J Mol Biol* 332, 601-615, doi:S0022283603008891 (2003).
- 10 Andersen, P. M. *et al.* Phenotypic heterogeneity in motor neuron disease patients with CuZn-superoxide dismutase mutations in Scandinavia. *Brain* 120 ( Pt 10), 1723-1737 (1997).
- 11 Segovia-Silvestre, T. *et al.* A novel exon 3 mutation (D76V) in the SOD1 gene associated with slowly progressive ALS. *Amyotroph Lateral Scler Other Motor Neuron Disord* 3, 69-74, doi:10.1080/146608202760196039 (2002).
- 12 Deng, H. X. *et al.* Two novel SOD1 mutations in patients with familial amyotrophic lateral sclerosis. *Hum Mol Genet* 4, 1113-1116 (1995).

- 13 Cao, X. *et al.* Structures of the G85R variant of SOD1 in familial amyotrophic lateral sclerosis. *J Biol Chem* 283, 16169-16177, doi:10.1074/jbc.M801522200 (2008).
- 14 Hayward, C., Brock, D. J., Minns, R. A. & Swingler, R. J. Homozygosity for Asn86Ser mutation in the CuZn-superoxide dismutase gene produces a severe clinical phenotype in a juvenile onset case of familial amyotrophic lateral sclerosis. *J Med Genet* 35, 174 (1998).
- 15 Beck, M., Sendtner, M. & Toyka, K. V. Novel SOD1 N86K mutation is associated with a severe phenotype in familial ALS. *Muscle Nerve* 36, 111-114, doi:10.1002/mus.20756 (2007).
- 16 Chou, C. M. *et al.* Identification of three mutations in the Cu,Zn-superoxide dismutase (Cu,Zn-SOD) gene with familial amyotrophic lateral sclerosis: transduction of human Cu,Zn-SOD into PC12 cells by HIV-1 TAT protein basic domain. *Ann N Y Acad Sci* 1042, 303-313, doi:1042/1/303 10.1196/annals.1338.053 (2005).
- 17 Andersen, P. M. *et al.* Autosomal recessive adult-onset amyotrophic lateral sclerosis associated with homozygosity for Asp90Ala CuZn-superoxide dismutase mutation. A clinical and genealogical study of 36 patients. *Brain* 119 ( Pt 4), 1153-1172 (1996).
- 18 Hosler, B. A. *et al.* Three novel mutations and two variants in the gene for Cu/Zn superoxide dismutase in familial amyotrophic lateral sclerosis. *Neuromuscul Disord* 6, 361-366, doi:0960896696003537 (1996).
- 19 Banci, L. *et al.* SOD1 and amyotrophic lateral sclerosis: mutations and oligomerization. *PLoS One* 3, e1677, doi:10.1371/journal.pone.0001677 (2008).
- 20 Enayat, Z. E. *et al.* Two novel mutations in the gene for copper zinc superoxide dismutase in UK families with amyotrophic lateral sclerosis. *Hum Mol Genet* 4, 1239-1240 (1995).
- 21 Esteban, J. *et al.* Identification of two novel mutations and a new polymorphism in the gene for Cu/Zn superoxide dismutase in patients with amyotrophic lateral sclerosis. *Hum Mol Genet* 3, 997-998 (1994).
- 22 Kawata, A., Kato, S., Hayashi, H. & Hirai, S. Prominent sensory and autonomic disturbances in familial amyotrophic lateral sclerosis with a Gly93Ser mutation in the SOD1 gene. *J Neurol Sci* 153, 82-85, doi:S0022510X97001767 (1997).
- 23 Yulug, I. G., Katsanis, N., de Belleruche, J., Collinge, J. & Fisher, E. M. An improved protocol for the analysis of SOD1 gene mutations, and a new mutation in exon 4. *Hum Mol Genet* 4, 1101-1104 (1995).
- 24 Jones, C. T., Shaw, P. J., Chari, G. & Brock, D. J. Identification of a novel exon 4 SOD1 mutation in a sporadic amyotrophic lateral sclerosis patient. *Mol Cell Probes* 8, 329-330, doi:S0890-8508(84)71046-2 10.1006/mcpr.1994.1046 (1994).
- 25 Ikeda, M. *et al.* Variable clinical symptoms in familial amyotrophic lateral sclerosis with a novel point mutation in the Cu/Zn superoxide dismutase gene. *Neurology* 45, 2038-2042 (1995).



- 26 Zhang, H. *et al.* A rare Cu/Zn superoxide dismutase mutation causing familial amyotrophic lateral sclerosis with variable age of onset and incomplete penetrance in China. *Amyotroph Lateral Scler Other Motor Neuron Disord* 6, 234-238, doi:L24162GM3N14L426 10.1080/14660820510044478 (2005).
- 27 Gellera, C. *et al.* Superoxide dismutase gene mutations in Italian patients with familial and sporadic amyotrophic lateral sclerosis: identification of three novel missense mutations. *Neuromuscul Disord* 11, 404-410, doi:S0960896600002157 (2001).
- 28 Jacobsson, J., Jonsson, P. A., Andersen, P. M., Forsgren, L. & Marklund, S. L. Superoxide dismutase in CSF from amyotrophic lateral sclerosis patients with and without CuZn-superoxide dismutase mutations. *Brain* 124, 1461-1466 (2001).
- 29 Mase, G. *et al.* ALS with variable phenotypes in a six-generation family caused by leu144phe mutation in the SOD1 gene. *J Neurol Sci* 191, 11-18, doi:S0022510X01006256 (2001).
- 30 Sapp, P. C. *et al.* Identification of three novel mutations in the gene for Cu/Zn superoxide dismutase in patients with familial amyotrophic lateral sclerosis. *Neuromuscul Disord* 5, 353-357, doi:096089669500007A (1995).
- 31 Ghadge, G. D. *et al.* Mutant superoxide dismutase-1-linked familial amyotrophic lateral sclerosis: molecular mechanisms of neuronal death and protection. *J Neurosci* 17, 8756-8766 (1997).
- 32 Pramatarova, A. *et al.* Identification of new mutations in the Cu/Zn superoxide dismutase gene of patients with familial amyotrophic lateral sclerosis. *Am J Hum Genet* 56, 592-596 (1995).
